# Supplementary material for: Dissecting the impact of bromodomain inhibitors on the Interferon Regulatory Factor 4‐MYC oncogenic axis in multiple myeloma
Source: PubMed Central journal article supplement (PMC9543246; doi:10.1002/hon.3016), 2022-05-18
Supplement: HON-40-417-s003.pdf [file HON-40-417-s003.pdf]

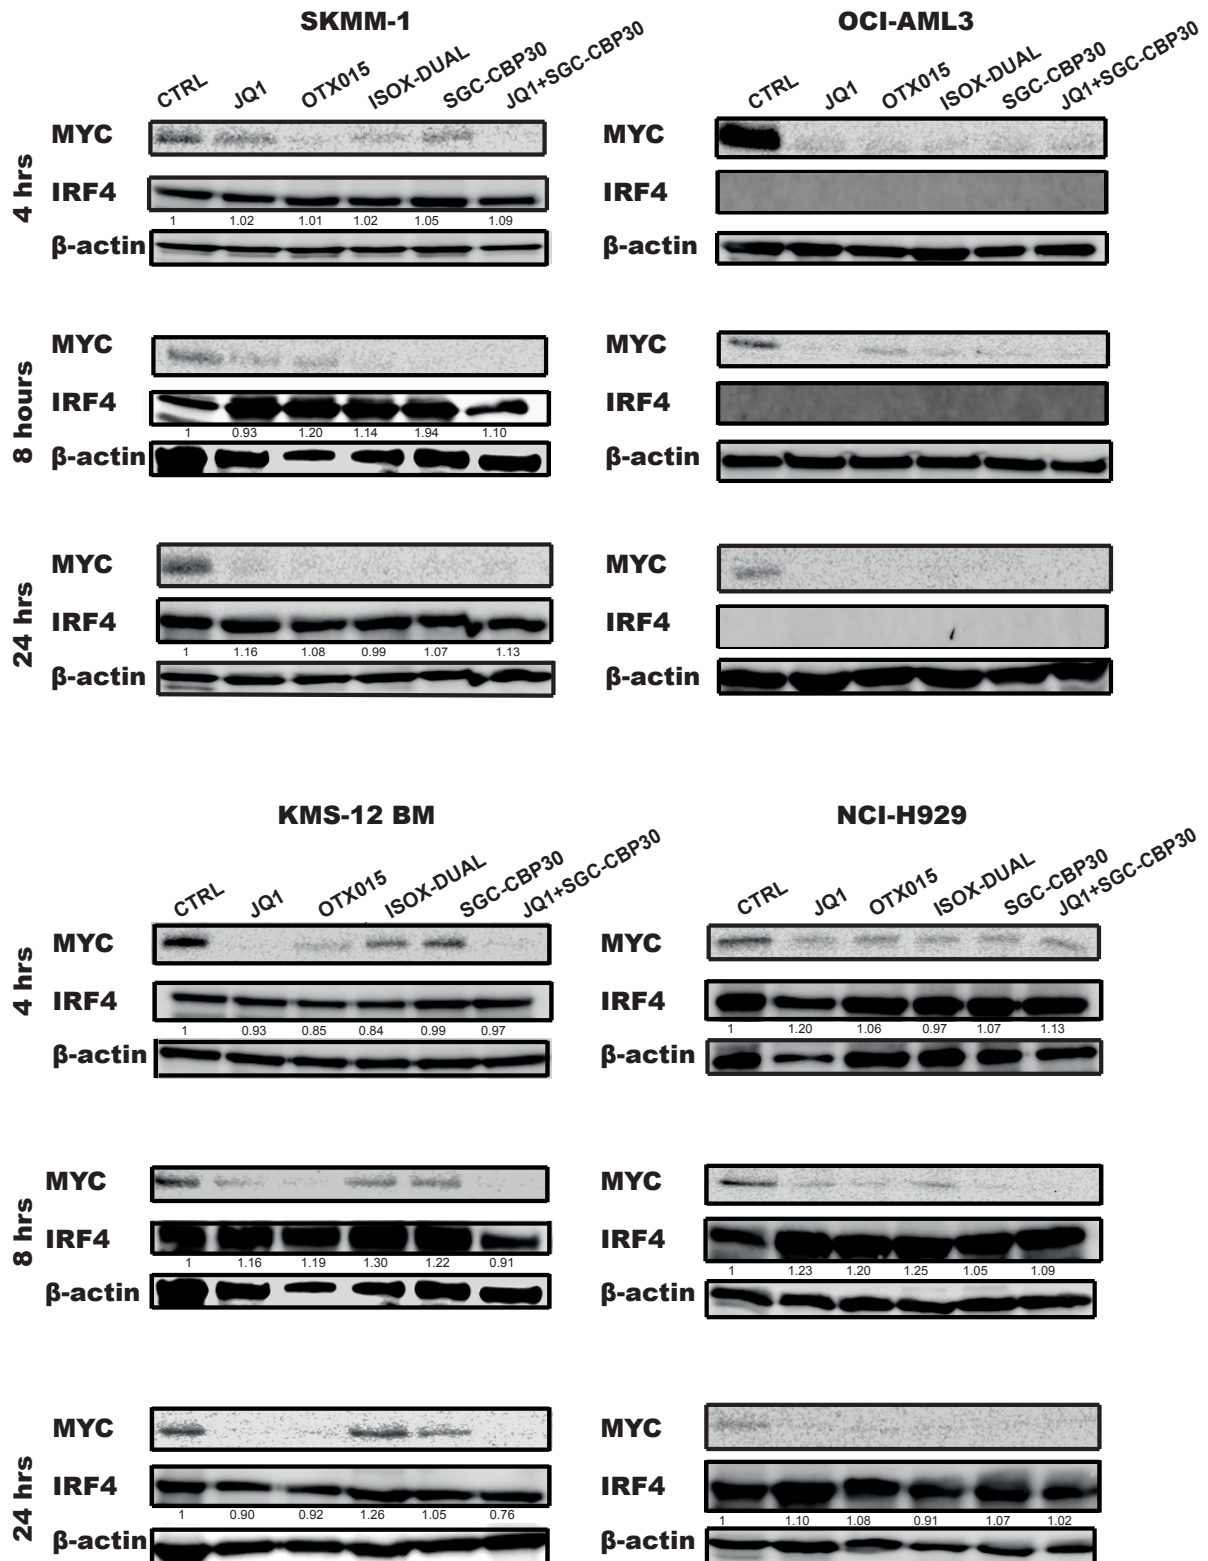

Supplementary Fig.2
